# Supplementary material for: Morning Cortisol Levels and Cognitive Abilities in People With Type 2 Diabetes: The Edinburgh Type 2 Diabetes Study
Source: PubMed Central journal article supplement — Diabetes Care. 2010 Jan 22;33(4):714–20. doi: 10.2337/dc09-1796 (PMC2845011; doi:10.2337/dc09-1796), 2010-01-22
Supplement: supp_dc09-1796_dc09-1796_online_appendix.pdf [file supp_dc09-1796_dc09-1796_online_appendix.pdf]

**Table 1 Online appendix. Results of the multiple linear regression analysis exploring the relationship between plasma cortisol levels and the general cognitive ability factor (g).**

|                                  | <i>unadjusted</i> |                | <i>Model 1<br/>+ gender and age</i> |                | <i>Model 2<br/>+MHVS</i> |                | <i>Model 3<br/>+ other covariates</i> |                | <i>Model 4<br/>+ interactions</i> |                |
|----------------------------------|-------------------|----------------|-------------------------------------|----------------|--------------------------|----------------|---------------------------------------|----------------|-----------------------------------|----------------|
|                                  | $\beta$           | <i>p-value</i> | $\beta$                             | <i>p-value</i> | $\beta$                  | <i>p-value</i> | $\beta$                               | <i>p-value</i> | $\beta$                           | <i>p-value</i> |
| Plasma cortisol (nmol/L)         | -0.045            | 0.202          | -0.030                              | 0.374          | -0.048                   | 0.086          | -0.051                                | 0.063          | -.305                             | 0.015          |
| Female sex                       |                   |                | 0.051                               | 0.136          | 0.105                    | <0.001         | 0.134                                 | <0.001         | 0.137                             | <0.001         |
| Age                              |                   |                | -0.220                              | <0.001         | -0.242                   | <0.001         | -0.227                                | <0.001         | -0.227                            | <0.001         |
| Mill Hill Vocabulary Scale       |                   |                |                                     |                | 0.570                    | <0.001         | 0.494                                 | <0.001         | 0.498                             | <0.001         |
| Education                        |                   |                |                                     |                |                          |                |                                       |                |                                   |                |
| Other professional qualification |                   |                |                                     |                |                          |                | -0.074                                | 0.052          | -0.075                            | 0.048          |
| Primary or secondary school      |                   |                |                                     |                |                          |                | -0.143                                | 0.001          | -0.143                            | <0.001         |
| Alcohol intake (drinks/week)     |                   |                |                                     |                |                          |                | 0.072                                 | 0.014          | 0.069                             | 0.018          |
| Smoking                          |                   |                |                                     |                |                          |                | 0.005                                 | 0.846          | 0.003                             | 0.907          |
| HADS-Depression score            |                   |                |                                     |                |                          |                | -0.128                                | <0.001         | -0.128                            | <0.001         |
| HADS-Anxiety score               |                   |                |                                     |                |                          |                | -0.020                                | 0.555          | -0.016                            | 0.617          |
| BMI                              |                   |                |                                     |                |                          |                | -0.023                                | 0.426          | -0.022                            | 0.457          |
| Duration of diabetes             |                   |                |                                     |                |                          |                | -0.071                                | 0.013          | -0.069                            | 0.015          |
| HbA1c                            |                   |                |                                     |                |                          |                | 0.032                                 | 0.260          | 0.030                             | 0.294          |
| Myocardial infarction            |                   |                |                                     |                |                          |                | -0.022                                | 0.482          | -0.021                            | 0.495          |
| Angina                           |                   |                |                                     |                |                          |                | 0.018                                 | 0.575          | 0.017                             | 0.582          |
| ABPI                             |                   |                |                                     |                |                          |                | -0.024                                | 0.405          | -0.244                            | 0.027          |
| Total cholesterol (mmol/L)       |                   |                |                                     |                |                          |                | -0.008                                | 0.776          | -0.010                            | 0.735          |
| Treated blood pressure           |                   |                |                                     |                |                          |                | 0.049                                 | 0.076          | 0.049                             | 0.074          |
| Stroke                           |                   |                |                                     |                |                          |                | -0.091                                | 0.001          | -0.089                            | 0.001          |
| Interaction cortisol by ABPI     |                   |                |                                     |                |                          |                |                                       |                | 0.331                             | 0.038          |

Abbreviations:

MHVS= Mill Hill Vocabulary Scale; HADS= Hospital Anxiety and Depression Scale; BMI= Body Mass Index; ABPI= Ankle-Brachial Index
